# Supplementary material for: Hydrogel Microdomain Encapsulation of Stable Functionalized Silver Nanoparticles for SERS pH and Urea Sensing
Source: MDPI journal article supplement (doi:10.3390/s19163521), 2019-08-12
Supplement: s1 [file s1]

## Supplemental Information

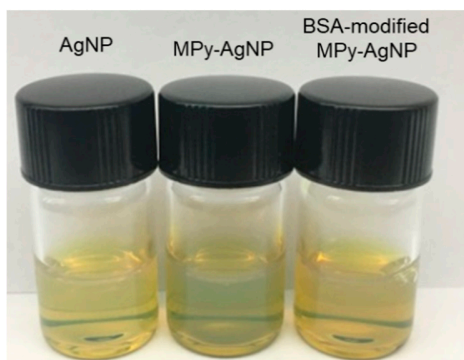

**Figure S1** Photographs of AgNPs, MPy-AgNPs, and BSA-modified MPy-AgNPs (left to right, respectively). From lightest to darkest are AgNPs, BSA-modified MPy-AgNPs, and MPy-AgNPs.

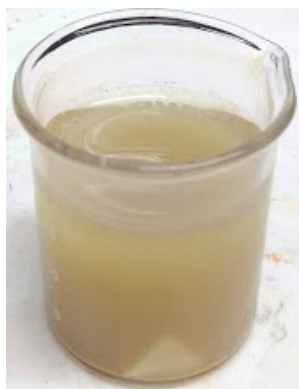

**Figure S2**  $\text{CaCO}_3$  microspheres containing BSA-modified MPy-AgNPs. In absence of BSA (microspheres containing MPy-AgNPs) a dark gray color results instead of the yellow-gray color seen above.

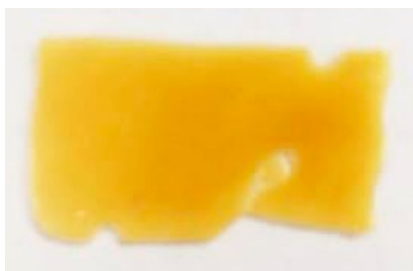

**Figure S3** Urea sensing hydrogel which contains microcapsules with BSA-modified MPy-AgNP cargo and urease conjugated to the matrix. The yellow color results from the BSA-modified MPy-AgNPs.

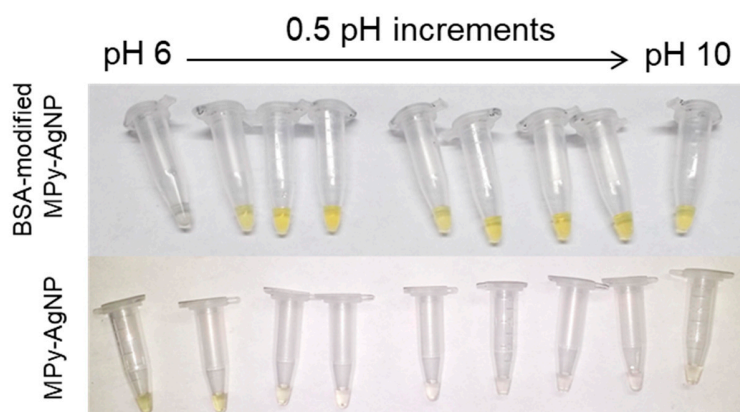

**Figure S4** Photographs of BSA-modified MPy-AgNP and MPy-AgNP at different pH. BSA-modified MPy-AgNP retains yellow color over wide pH range, indicating colloidal stability whereas MPy-AgNP only exhibits yellow at lower pHs.

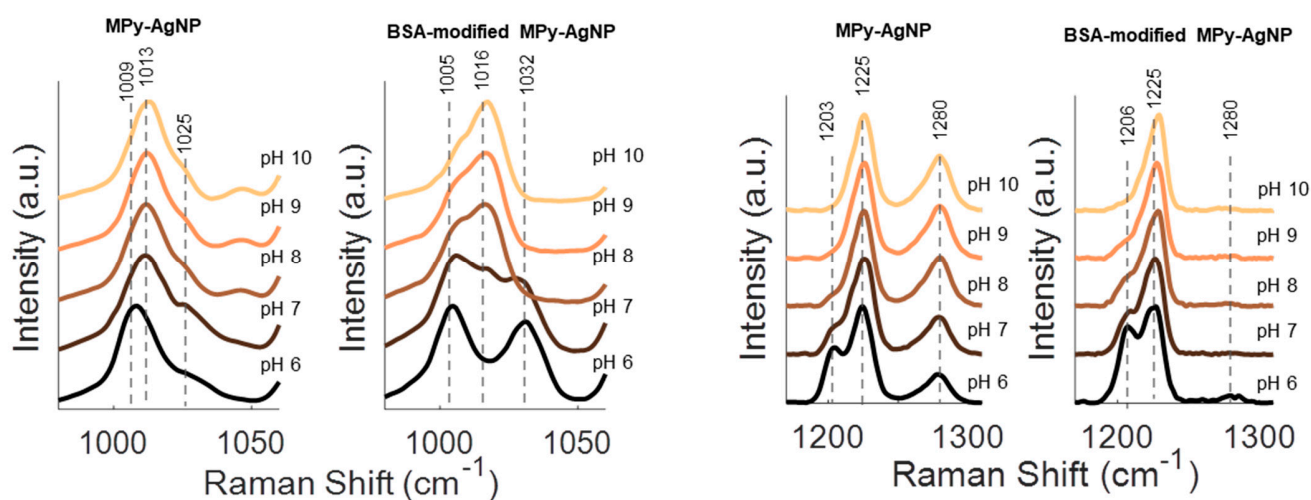

**Figure S5** Comparison of pH-sensitive SERS bands for MPy-AgNP and BSA-modified MPy-AgNP.

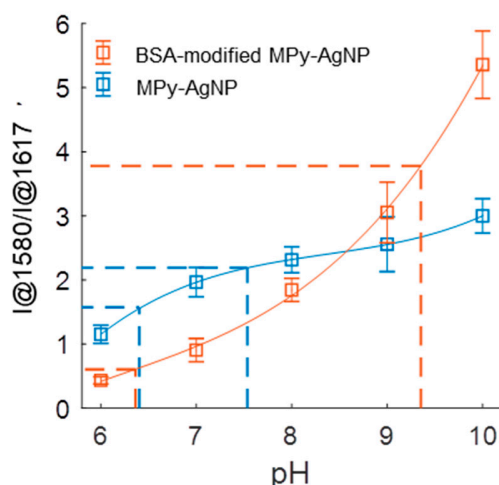

**Figure S6** pH calibration curve using  $I_{@1580}/I_{@1617}$  ratio. The band at  $1580\text{ cm}^{-1}$  disappears for BSA-modified MPy-AgNP. LLOD and ULOD for MPy-AgNP using  $I_{@1580}/I_{@1617}$  are 6.4 and 7.5 units pH respectively. The sensitivity of MPy-AgNP is 0.5 units/pH. LLOD and ULOD for BSA-modified MPy-AgNP are 6.4 and 9.4 units pH respectively. The sensitivity of BSA-modified MPy-AgNP is 1.2 units/pH.

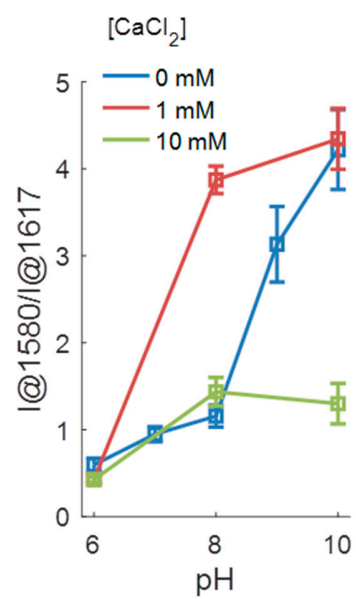

**Figure S7** pH calibration curve using the  $I_{@1580}/I_{@1617}$  ratio for BSA-modified MPy-AgNP in 10 mM Tris Maleate Buffer containing 0, 1, and 10 mM  $\text{CaCl}_2$ .
